# Supplementary material for: Potential Role of Febrile Seizures and Other Risk Factors Associated With Sudden Deaths in Children
Source: JAMA Netw Open. 2019 Apr 26;2(4):e192739. doi: 10.1001/jamanetworkopen.2019.2739 (PMC6487567; doi:10.1001/jamanetworkopen.2019.2739)
Supplement: Supplement. — eTable 1. SUDC Foundation Family Interview Data Collected eTable 2. Detailed Demographic and Interview Histories for the SEDC and SUDC (N = 391) eFigure. Sibling Age Distributions With Known Birthdate as of October 24, 2018, in Years (n = 473) eTable 3. Cause of Death for Sudden, Unexpected, and Explained Cases (SEDC) With Interviews (N = 127) eTable 4. SEDC vs SUDC Interview Factors With Adjusted P Values ≠1.000 [file jamanetwopen-2-e192739-s001.pdf]

## Supplementary Online Content

Crandall LG, Lee JH, Stainman R, Friedman D, Devinsky O. Potential role of febrile seizures and other risk factors associated with sudden deaths in children. *JAMA Netw Open*. 2019;2(4):e192739. doi:10.1001/jamanetworkopen.2019.2739

**eTable 1.** SUDC Foundation Family Interview Data Collected

**eTable 2.** Detailed Demographic and Interview Histories for the SEDC and SUDC (N = 391)

**eFigure.** Sibling Age Distributions With Known Birthdate as of October 24, 2018, in Years (n = 473)

**eTable 3.** Cause of Death for Sudden, Unexpected, and Explained Cases (SEDC) With Interviews (N = 127)

**eTable 4.** SEDC vs SUDC Interview Factors With Adjusted *P* Values  $\neq$ 1.000

This supplementary material has been provided by the authors to give readers additional information about their work.

**eTable 1.** SUDC Foundation Family Interview Data Collected

|                                         |                                                                                                                                                                                                                                                                                                                                                                                                                                                                                                                                       |
|-----------------------------------------|---------------------------------------------------------------------------------------------------------------------------------------------------------------------------------------------------------------------------------------------------------------------------------------------------------------------------------------------------------------------------------------------------------------------------------------------------------------------------------------------------------------------------------------|
| <b>Demographics</b>                     | <ul style="list-style-type: none"> <li>• Gender</li> <li>• Race and ethnicity</li> <li>• Child's DOB and DOD</li> <li>• Mother's age at time of birth and death</li> <li>• Father's age at time of birth and death</li> </ul>                                                                                                                                                                                                                                                                                                         |
| <b>Maternal History</b>                 | <ul style="list-style-type: none"> <li>• Pregnancy history (# para, # gravida, # total live births, # miscarriages, # abortions, # still births)</li> <li>• Order of pregnancy of deceased?</li> <li>• How long did it take for the mom to get pregnant?</li> <li>• Was assisted reproductive technology (fertility medicals, IVF, surrogacy) used to conceive the child?</li> <li>• Any medication and drug use during pregnancy?</li> </ul>                                                                                         |
| <b>Birth History and Infant History</b> | <ul style="list-style-type: none"> <li>• Was the decedent born full-term?</li> <li>• Any complications with delivery? <ul style="list-style-type: none"> <li>◦ Any history of pre-eclampsia</li> </ul> </li> <li>• Did they sleep supine?</li> <li>• Did they use a pacifier?</li> <li>• Was the infant breastfed? If so, for how long?</li> <li>• Did the infant ever experience blue spells, paleness, or limpness?</li> <li>• Was the child exposed to smoke? Did anyone smoke in home? Did mom smoke during pregnancy?</li> </ul> |
| <b>Medical History</b>                  | <ul style="list-style-type: none"> <li>• In their life, did they have history of fasting more than 12 hrs or a history of vomiting more than 12 hours?</li> <li>• Did they have a history of sleep apnea, chronic lung disease, asthma, GERD, muscle weakness, congenital heart disease, irregular heartbeats, choking spells, bradycardia, or syncope?</li> <li>• Did they have any allergies? If so, what were they?</li> </ul>                                                                                                     |

|                                                               |                                                                                                                                                                                                                                                                                                                                                                                                                                                                                                                                                                                                     |
|---------------------------------------------------------------|-----------------------------------------------------------------------------------------------------------------------------------------------------------------------------------------------------------------------------------------------------------------------------------------------------------------------------------------------------------------------------------------------------------------------------------------------------------------------------------------------------------------------------------------------------------------------------------------------------|
|                                                               | <ul style="list-style-type: none"> <li>• Did they child have any seizures? Were they febrile? Were they simple or complex febrile seizures?</li> <li>• Did they have any surgeries?</li> <li>• Were they ever hospitalized?</li> <li>• Were their vaccinations up to date? When was their last vaccination?</li> <li>• Did they take any medications on a regular basis?</li> </ul>                                                                                                                                                                                                                 |
| <b>Developmental and Social Factors</b>                       | <ul style="list-style-type: none"> <li>• How was their development?</li> <li>• Do you or your doctor have any concerns regarding your child's development?</li> <li>• Did they have any special needs or receive any special services?</li> <li>• What were their childcare arrangements?</li> <li>• Did they go to daycare? If so, from what age?</li> <li>• If they were school aged, what grade were they in and how were they performing in school?</li> </ul>                                                                                                                                  |
| <b>Family History of First and/or Second Degree Relatives</b> | <ul style="list-style-type: none"> <li>• Febrile seizures, epilepsy or seizures, psychiatric disorders, autism, multiple sclerosis, migraines?</li> <li>• Apparent life-threatening event (ALTE), unexplained death less than 50 years of age, sudden explained death of any age?</li> <li>• Sleep Apnea, Sleep Disorders?</li> <li>• Premature births?</li> <li>• Cardiac Disease, Crohn's Disease, Lupus, Rheumatoid Arthritis, Diabetes Mellitus Types 1 and 2, Tourette's syndrome, Autoimmune Disorders.</li> <li>• Any other family medical history you think is worth mentioning?</li> </ul> |

|                                              |                                                                                                                                                                                                                                                                                                                                                                                                                                                                                                                                                                                                                                                                                                                                                                                                                                                                                                                                                                                                                                                                                                                                                           |
|----------------------------------------------|-----------------------------------------------------------------------------------------------------------------------------------------------------------------------------------------------------------------------------------------------------------------------------------------------------------------------------------------------------------------------------------------------------------------------------------------------------------------------------------------------------------------------------------------------------------------------------------------------------------------------------------------------------------------------------------------------------------------------------------------------------------------------------------------------------------------------------------------------------------------------------------------------------------------------------------------------------------------------------------------------------------------------------------------------------------------------------------------------------------------------------------------------------------|
| <p><b>Circumstances of Child's Death</b></p> | <ul style="list-style-type: none"> <li>• Was there any recent head trauma within the last two weeks of their life?</li> <li>• What were their terminal symptoms in the last 48 hours? <ul style="list-style-type: none"> <li>○ Was there a fever?</li> </ul> </li> <li>• What medications did they take in the last 24 hours?</li> <li>• When and where was the child last known alive and by whom?</li> <li>• When and where was the child found responsive and by whom? <ul style="list-style-type: none"> <li>○ What day of the week did it occur?</li> <li>○ What season was it?</li> </ul> </li> <li>• Was the death witnessed?</li> <li>• Was it a sleep-related death? <ul style="list-style-type: none"> <li>○ Was the sleep surface?</li> <li>○ Please describe the sleep environment.</li> <li>○ Was the child sharing the sleep surface with another human being or animal?</li> </ul> </li> <li>• What were the body, face, and extremities positions when the child was found?</li> <li>• Was the nose or mouth obstructed?</li> <li>• Were there any fluids around the face?</li> <li>• What devices were operating in the room?</li> </ul> |
| <p><b>Death Investigations</b></p>           | <ul style="list-style-type: none"> <li>• Describe the investigation performed <ul style="list-style-type: none"> <li>○ Was there a scene investigation?</li> <li>○ Was there an autopsy?</li> <li>○ Were there any interviews? If so, who conducted the interviews and by what office?</li> </ul> </li> <li>• What was the final cause of death certification?</li> </ul>                                                                                                                                                                                                                                                                                                                                                                                                                                                                                                                                                                                                                                                                                                                                                                                 |

**eTable 2.** Detailed Demographic and Interview Histories for the SEDC and SUDC (N = 391)

| <b>Factors</b>                                  | <b>Total SEDC Deaths (N=127)</b> | <b>Total SUDC Deaths (N=264)</b> |
|-------------------------------------------------|----------------------------------|----------------------------------|
| <b>Demographics</b>                             |                                  |                                  |
| Median Age (mo) at death (IQR)                  | 22 (17-31)                       | 20 (16-27.25)                    |
| Males                                           | 85 (66.3%)                       | 146 (55.3%)                      |
| Race and Ethnicity†                             |                                  |                                  |
| <i>White</i>                                    | 104/127 (81.9%)                  | 221/262 (84.4%)                  |
| <i>Black/African American</i>                   | 4/127 (3.2%)                     | 8/262 (3.1%)                     |
| <i>Asian/Pacific Islander</i>                   | 4/127 (3.2%)                     | 5/262 (1.9%)                     |
| <i>Hispanic</i>                                 | 3/127 (2.4%)                     | 5/262 (1.9%)                     |
| <i>Mixed/Other</i>                              | 12/127 (9.5%)                    | 23/262 (8.8%)                    |
| Median mother's age at time of birth (IQR)      | 31 (28.5-33)                     | 30 (27-34)                       |
| Median father's age at time of birth (IQR)      | 32.5 (29.75-36)                  | 32.5 (29-36.25)                  |
| <b>Maternal and Birth History**</b>             |                                  |                                  |
| Median para (IQR)                               | 2 (2-3)                          | 2 (1-3)                          |
| <i>Mother had miscarriage†</i>                  | 26/88 (29.6%)                    | 63/186 (33.9%)                   |
| <i>Median number of miscarriages</i>            | 0 (0-1)                          | 0 (0-1)                          |
| <i>Pregnancies lost/Total Pregnancies</i>       | 13.7%                            | 23.2%                            |
| Birth order of deceased (IQR)                   | 2 (1-3)                          | 2 (1-3)                          |
| NICU stay                                       | 10 (7.9%)                        | 15 (5.7%)                        |
| Normal Delivery/No Complications                | 53 (41.7%)                       | 101 (38.3%)                      |
| Term †                                          | 61/72 (84.7%)                    | 111/136 (81.6%)                  |
| <b>Child Medical History and Social Factors</b> |                                  |                                  |
| Normal Child Development                        | 95 (74.8%)                       | 201 (76.1%)                      |
| Received early intervention                     | 7 (5.5%)                         | 25 (9.5%)                        |
| Allergy history                                 | 29 (22.8%)                       | 33 (12.5%)                       |
| Hospitalization history                         | 48 (37.8%)                       | 107 (40.5%)                      |
| Surgical history                                | 16 (12.6%)                       | 23 (8.7%)                        |
| FS history                                      | 28 (22.1%)                       | 76 (28.8%)                       |

| <b>Factors</b>                                         | <b>Total SEDC Deaths (N=127)</b> | <b>Total SUDC Deaths (N=264)</b> |
|--------------------------------------------------------|----------------------------------|----------------------------------|
| Afebrile seizures history                              | 1 (0.8%)                         | 7(2.7%)†                         |
| Syncope history                                        | 1 (0.8%)                         | 7 (2.7%)                         |
| Sleep apnea history                                    | 1 (0.8%)                         | 3 (1.1%)                         |
| Breastfed < 3 months†                                  | 20/98 (20.4%)                    | 51/203 (25.1%)                   |
| Breastfed > 3 months†                                  | 62/98 (63.3%)                    | 108/203 (53.2%)                  |
| Vaccinations up to date at death                       | 99 (78.0%)                       | 214 (81.1%)                      |
| <i>Last vaccination: &lt; 2 weeks prior to death†</i>  | 6/65 (9.2%)                      | 20/150 (13.3%)                   |
| Prenatal smoke exposure†                               | 1/94 (1.1%)                      | 3/186 (1.6%)                     |
| Postnatal secondhand smoke†                            | 7/94 (7.5%)                      | 23/186 (12.4%)                   |
| <b>Factors Related to Child FS History</b>             |                                  |                                  |
| FS History                                             | 28/127 (22.1%)                   | 76 (28.8%)                       |
| Afebrile Seizure                                       | 1 (0.8%)                         | 7 (2.7%)†                        |
| Median age (mo) at first Sz (FS/aFS) (IQR)             | 16 (12-20);N=29                  | 14 (11-18);N=79                  |
| Median duration (min) of the longest Sz (FS/aFS) (IQR) | 2.75 (1-3)                       | 3 (1-5)                          |
| Last Sz: < 48 h prior to death†                        | 2/21 (9.5%)                      | 7/61 (11.5%)                     |
| Last Sz: btwn 48 h and 1 mo prior to death†            | 0/21 (0.0%)                      | 4/61 (6.6%)                      |
| Last Sz: > 1 month prior to death†                     | 19/21 (90.5%)                    | 50/61 (82.0%)                    |
| <b>Family History*†</b>                                |                                  |                                  |
| FS                                                     | 24/117 (20.5%)                   | 87/241 (36.1%)                   |
| <i>First Degree Relatives</i>                          | 21/117 (18.0%)                   | 57/241 (23.7%)                   |
| <i>Second Degree Relatives</i>                         | 10/117 (8.6%)                    | 45/241 (18.7%)                   |
| Afebrile seizures                                      | 31/125 (24.8%)                   | 73/243 (30.0%)                   |
| Syncope                                                | 21/113 (18.6%)                   | 40/231 (17.3%)                   |
| Sudden unexplained deaths                              | 7/115 (6.1%)                     | 10/240 (4.2%)                    |
| <b>Circumstances of Death</b>                          |                                  |                                  |
| Day of Death = Weekday                                 | 68 (53.5%)                       | 141 (53.4%)                      |
| Season of death                                        |                                  |                                  |
| <i>Fall</i>                                            | 28 (22.1%)                       | 53 (20.1%)                       |
| <i>Spring</i>                                          | 20 (15.8%)                       | 57 (21.6%)                       |

| <b>Factors</b>                                                          | <b>Total SEDC Deaths (N=127)</b> | <b>Total SUDC Deaths (N=264)</b> |
|-------------------------------------------------------------------------|----------------------------------|----------------------------------|
| <i>Summer</i>                                                           | 26 (20.5%)                       | 44 (16.7%)                       |
| <i>Winter</i>                                                           | 53 (41.7%)                       | 110 (41.7%)                      |
| Terminal fever 48H before death†                                        | 49/120 (40.8%)                   | 112/245 (45.7%)                  |
| <b>Circumstances of Death for Sleep-Related Child Deaths Only</b>       |                                  |                                  |
| Apparent death during sleep                                             | 111 (87.4%)                      | 256 (97.0%)                      |
| Body position prone at death†                                           | 74/93 (79.6%)                    | 173/211 (82.0%)                  |
| Face down at death†                                                     | 44/84 (52.4%)                    | 122/192 (63.5%)                  |
| Surface Discovered Unresponsive†                                        |                                  |                                  |
| <i>Crib</i>                                                             | 60/94 (63.8%)                    | 135/226 (59.7%)                  |
| <i>Bed/Mattress (Toddler, Twin, Full, Queen, King)</i>                  | 26/94 (27.7%)                    | 61/226 (2%)                      |
| <i>Other Surfaces (Couch, chair, floor, playpen/playyard, car seat)</i> | 8/94 (8.5%)                      | 30/226 (13.3%)                   |
| Sleeping conditions at death°                                           |                                  |                                  |
| <i>Pillow</i>                                                           | 37 (29.1%)                       | 76 (28.8%)                       |
| <i>Blanket/Quilt</i>                                                    | 56 (44.1%)                       | 127 (48.1%)                      |
| <i>Stuffed Toy</i>                                                      | 38 (29.9%)                       | 76 (28.8%)                       |
| Sleeping with others                                                    | 8/87 (9.2%)                      | 16/210 (7.6%)                    |
| Death Witnessed†                                                        | 13/127 (10.2%)                   | 16/262 (6.1%)                    |

Unless otherwise noted, each cell is in the following format: n/N([{n/N}\*100])% with n being the sample size and N being population size of each column.

FS: Febrile Seizure; aFS: Afebrile Seizure

† One subject also had a history of simple FS

†: No./Total No. with known data (%)

†† Unable to calculate p-value due to non-exclusive answers

°: Subjects may fall under multiple categories, cannot conduct statistical analysis

\*\*: Subjects answered to birth complications in a narrative form; counts cannot be added toward the total, thus unable to calculate p-value

x/n= the number of cases divided by total number of cases in this subgroup with any Sz Hz

Significant Adjusted p-values are listed in Table 1

**eFigure.** Sibling Age Distributions With Known Birthdate as of October 24, 2018, in Years (n = 473)

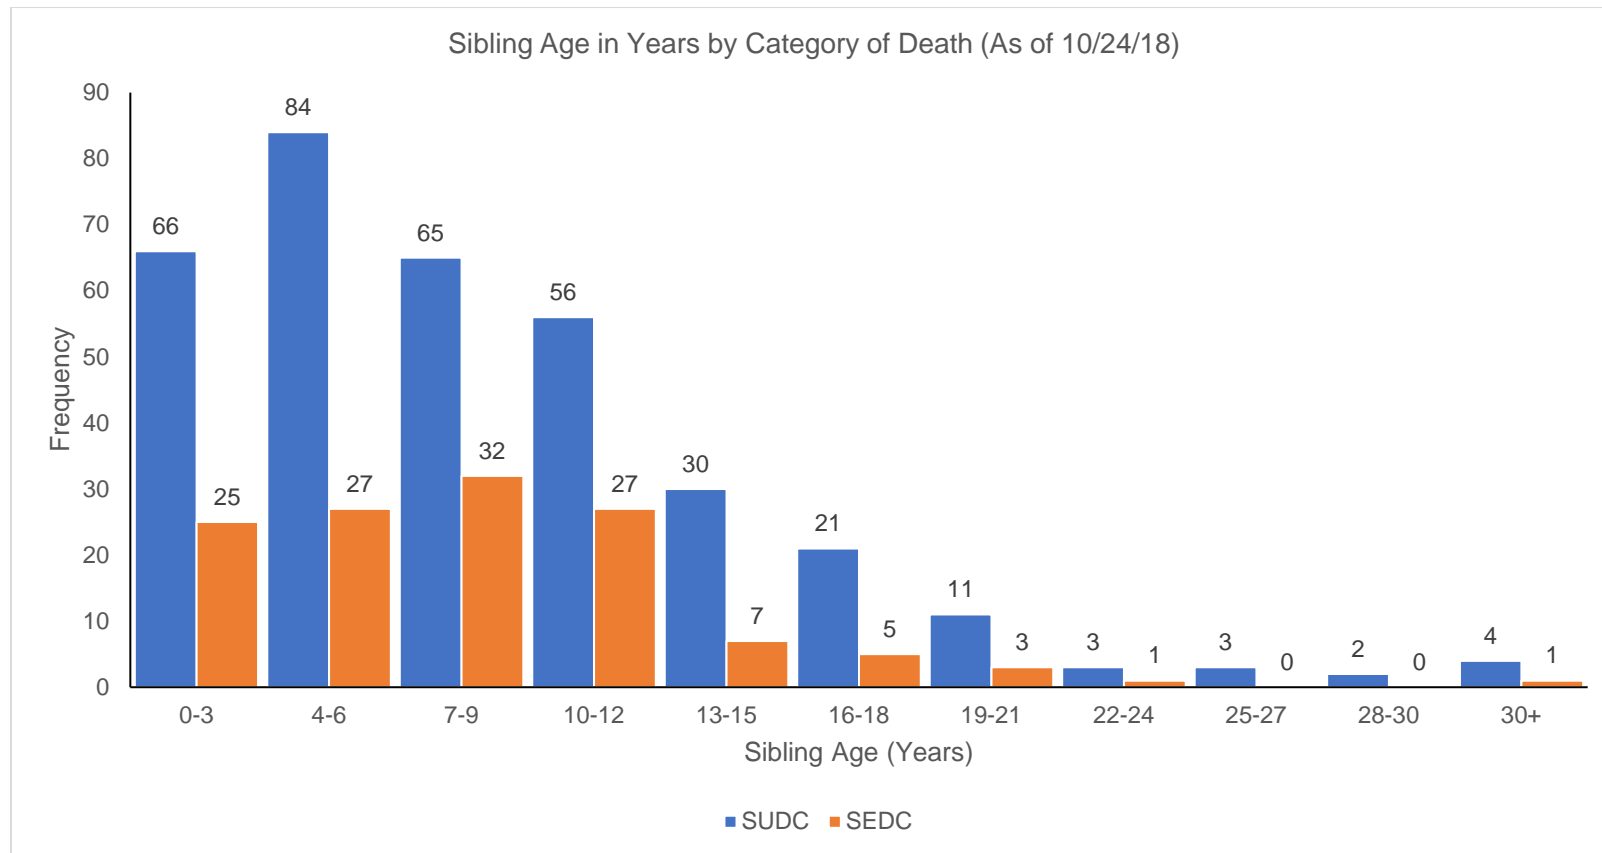

**eTable 3.** Cause of Death for Sudden, Unexpected, and Explained Cases (SEDC) With Interviews (N = 127)

| <b>Final Diagnosis</b>                                                    | <b>Count</b>       |
|---------------------------------------------------------------------------|--------------------|
| <b><i>Accidental Deaths</i></b>                                           | <b><i>N=12</i></b> |
| Asphyxia Related                                                          | 10                 |
| Drowning                                                                  | 1                  |
| Hyperthermia                                                              | 1                  |
| <b><i>Natural Infectious Deaths</i></b>                                   | <b><i>N=73</i></b> |
| Pneumonia                                                                 | 22                 |
| Viral Infection                                                           | 17                 |
| Respiratory Infection (Bronchitis, Bronchiolitis, Tracheitis, Laryngitis) | 10                 |
| Myocarditis                                                               | 7                  |
| Influenza                                                                 | 5                  |
| Bacterial Infection                                                       | 4                  |
| Meningitis                                                                | 2                  |
| Encephalitis                                                              | 2                  |
| Sepsis                                                                    | 2                  |
| Unspecified Infection                                                     | 2                  |
| <b><i>Natural Non-Infectious Deaths</i></b>                               | <b><i>N=42</i></b> |
| Seizure-Related Deaths                                                    | 13                 |
| Cardiomyopathy                                                            | 8                  |
| Cardiac Dysrhythmia                                                       | 6                  |
| Asthma                                                                    | 3                  |
| Congenital Heart Defects                                                  | 3                  |
| Acute Congestive Heart Failure                                            | 1                  |
| Anoxic Brain Injury                                                       | 1                  |
| Cerebral Cortical Dysplasia                                               | 1                  |
| Meckells Diverticulum                                                     | 1                  |
| Hyperglycemia                                                             | 1                  |
| Congenital Metabolic Disorder                                             | 1                  |
| Dehydration                                                               | 1                  |
| Disseminated Intravascular Coagulation                                    | 1                  |
| AV Nodal Artery Dysplasia                                                 | 1                  |

**eTable 4.** SEDC vs SUDC Interview Factors With Adjusted *P* Values ≠1.000

| <b>Factors</b>         | <b>Total SEDC Deaths<br/>Vs.<br/>Total SUDC Deaths<br/>Adjusted p-Values*</b> |
|------------------------|-------------------------------------------------------------------------------|
| Gender                 | 0.9423                                                                        |
| Race and Ethnicity     | NC                                                                            |
| Smoke History          | NC                                                                            |
| Child History          |                                                                               |
| <i>Allergy history</i> | 0.2990                                                                        |
| <i>Afebrile Sz</i>     | NC                                                                            |
| <i>Syncope</i>         | NC                                                                            |
| <i>Sleep apnea</i>     | NC                                                                            |
| Family History         |                                                                               |
| <i>FS</i>              | 0.0974                                                                        |
| Death during sleep     | 0.0080†                                                                       |

\*Adjusted P-Values using the Holm-Bonferroni Method; NC = not calculable, expected values < 5 so unable to perform chi-square tests.

† Denotes p-value <.05
